# Supplementary material for: Multimodal smart sensing via wavelength-selective hydrochromism in zero-dimensional metal halides
Source: Research Square preprint supplement (doi:10.21203/rs.3.rs-8728096/v1), 2026-02-02
Supplement: Supplementary file 1 [file 3099b2d8eca2b593f87d670b.docx]

**Supplementary Information**

**Multimodal smart sensing via wavelength-selective hydrochromism in zero-dimensional metal halides**

**Joo Hyeong Han, Jeong Min Seo, Tuhin Samanta, Sung Woo Jang, Yong Min Park****, San Ha Choi, Ji Hyeon Cha, and Won Bin Im***

*Division of Materials Science and Engineering, Hanyang University, 222 Wangsimni-ro, Seongdong-gu, Seoul, 04763, Republic of Korea*

*****To whom correspondence should be addressed.

E-mail: [imwonbin@hanyang.ac.kr](mailto:imwonbin@hanyang.ac.kr)

**Supplementary Table 1.** Rietveld refinement parameters of combined X-ray diffraction profiles of Cs3GdCl6. The numbers in parentheses are the estimated standard deviations of the last signiﬁcant ﬁgure.

| parameters | value |
| --- | --- |
| symmetry | monoclinic |
| space group | *C*2/*c* |
| *a* (Å) | 27.025(8) |
| *b* (Å) | 8.172(2) |
| *c* (Å) | 13.235(9) |
| *α* (°) | 90.000 |
| *β* (°) | 100.094(2) |
| *γ* (°) | 90.000 |
| *V* (Å3) | 2877.568(2) |
| *Rwp* (%) | 7.63 |
| *χ*2 | 1.826 |

**
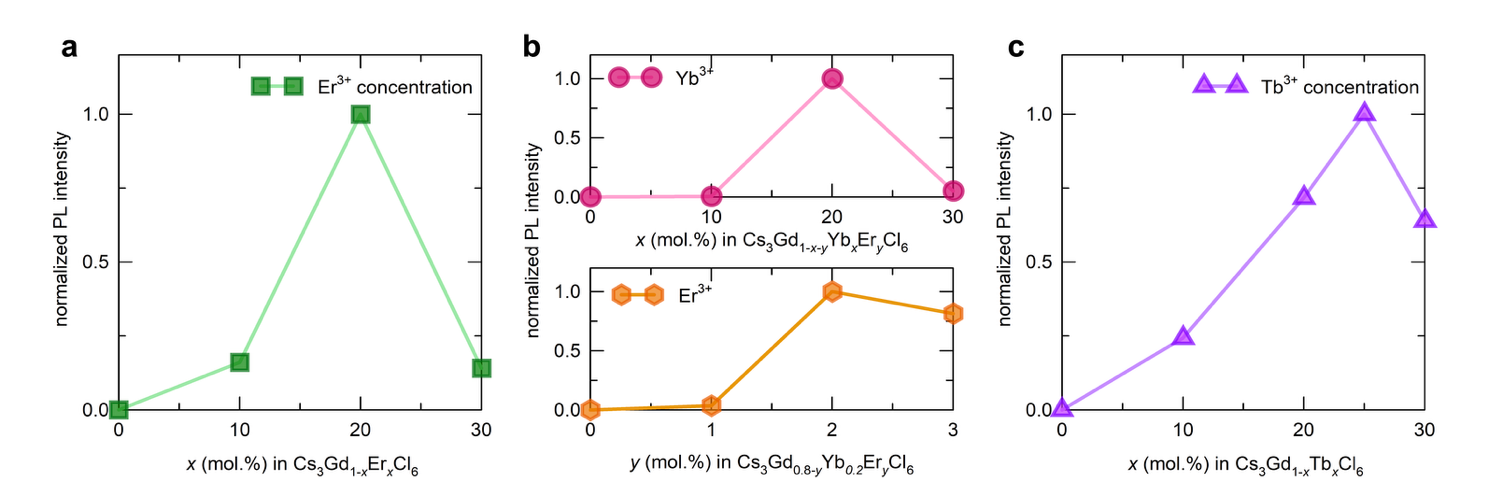
**

**Supplementary Fig. 1.** Normalized PL intensity of Cs3Gd1-*x*Ln*x*Cl6 as a function of **a** Er3+, **b** Yb3+-Er3+, and **c** Tb3+ concentration.


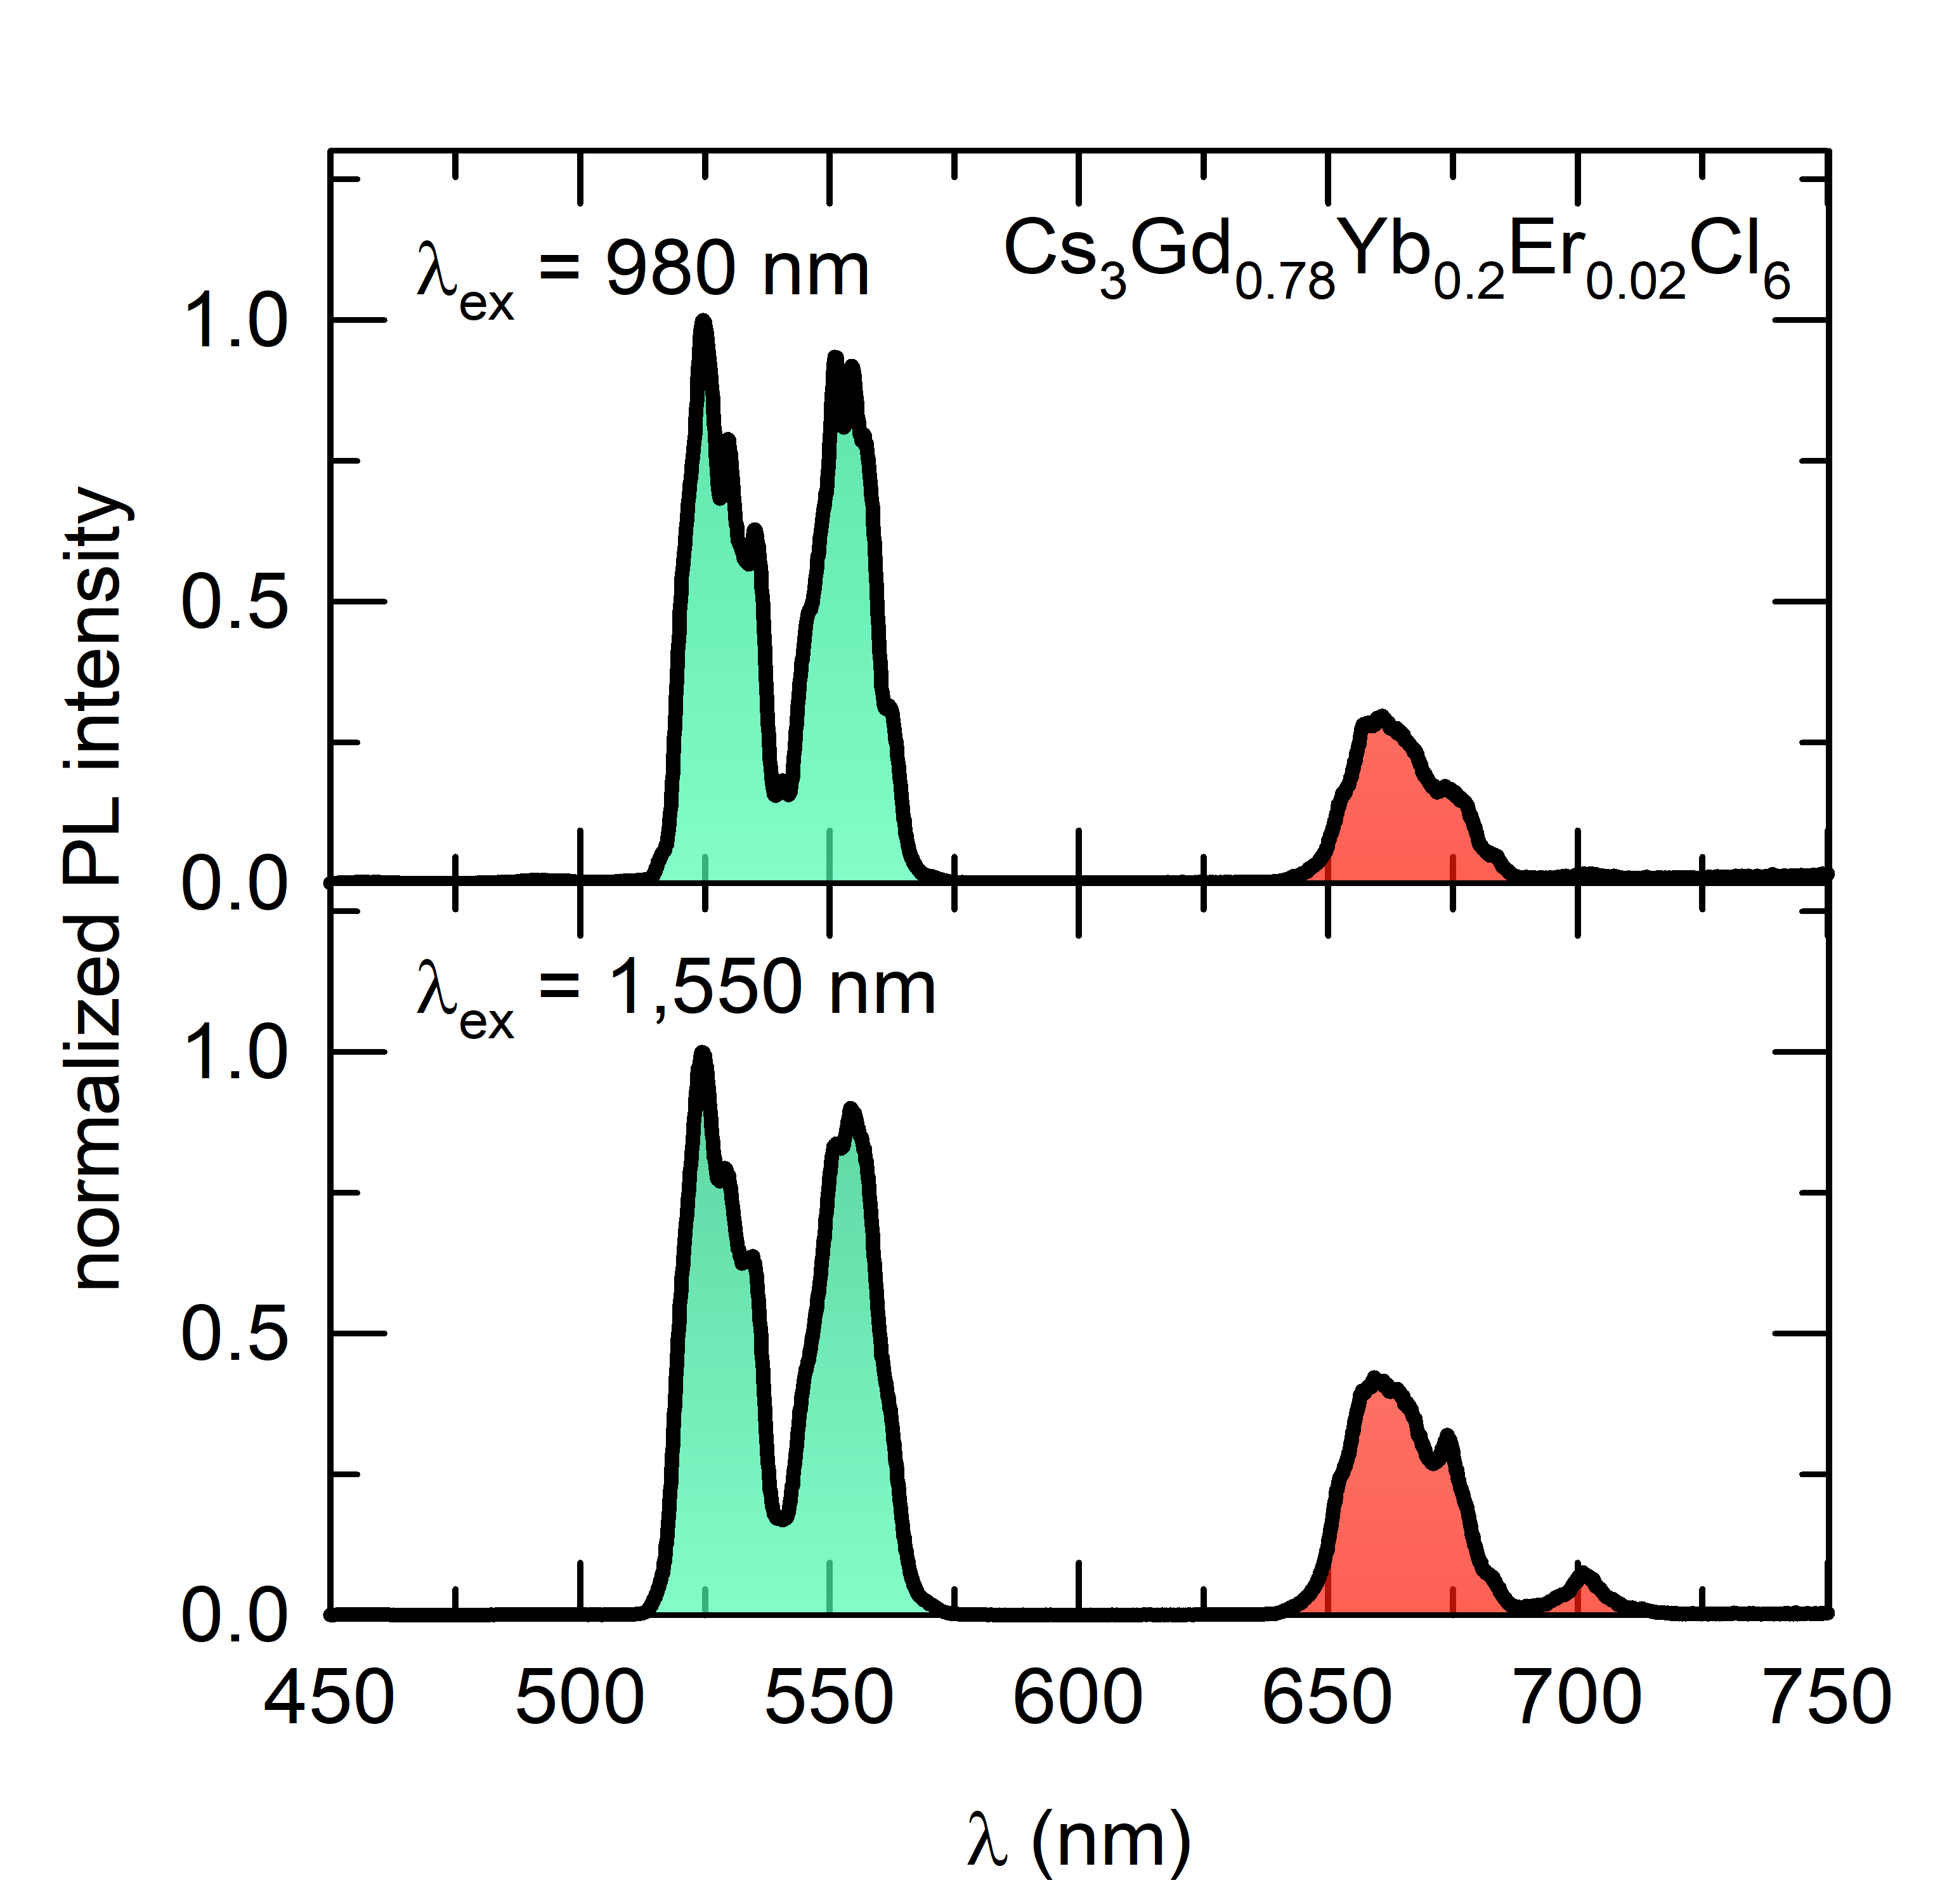


**Supplementary Fig. 2.** PL spectra under 980 nm and 1550 nm excitation of Cs3Gd0.78Yb0.2Er0.02Cl6.

**
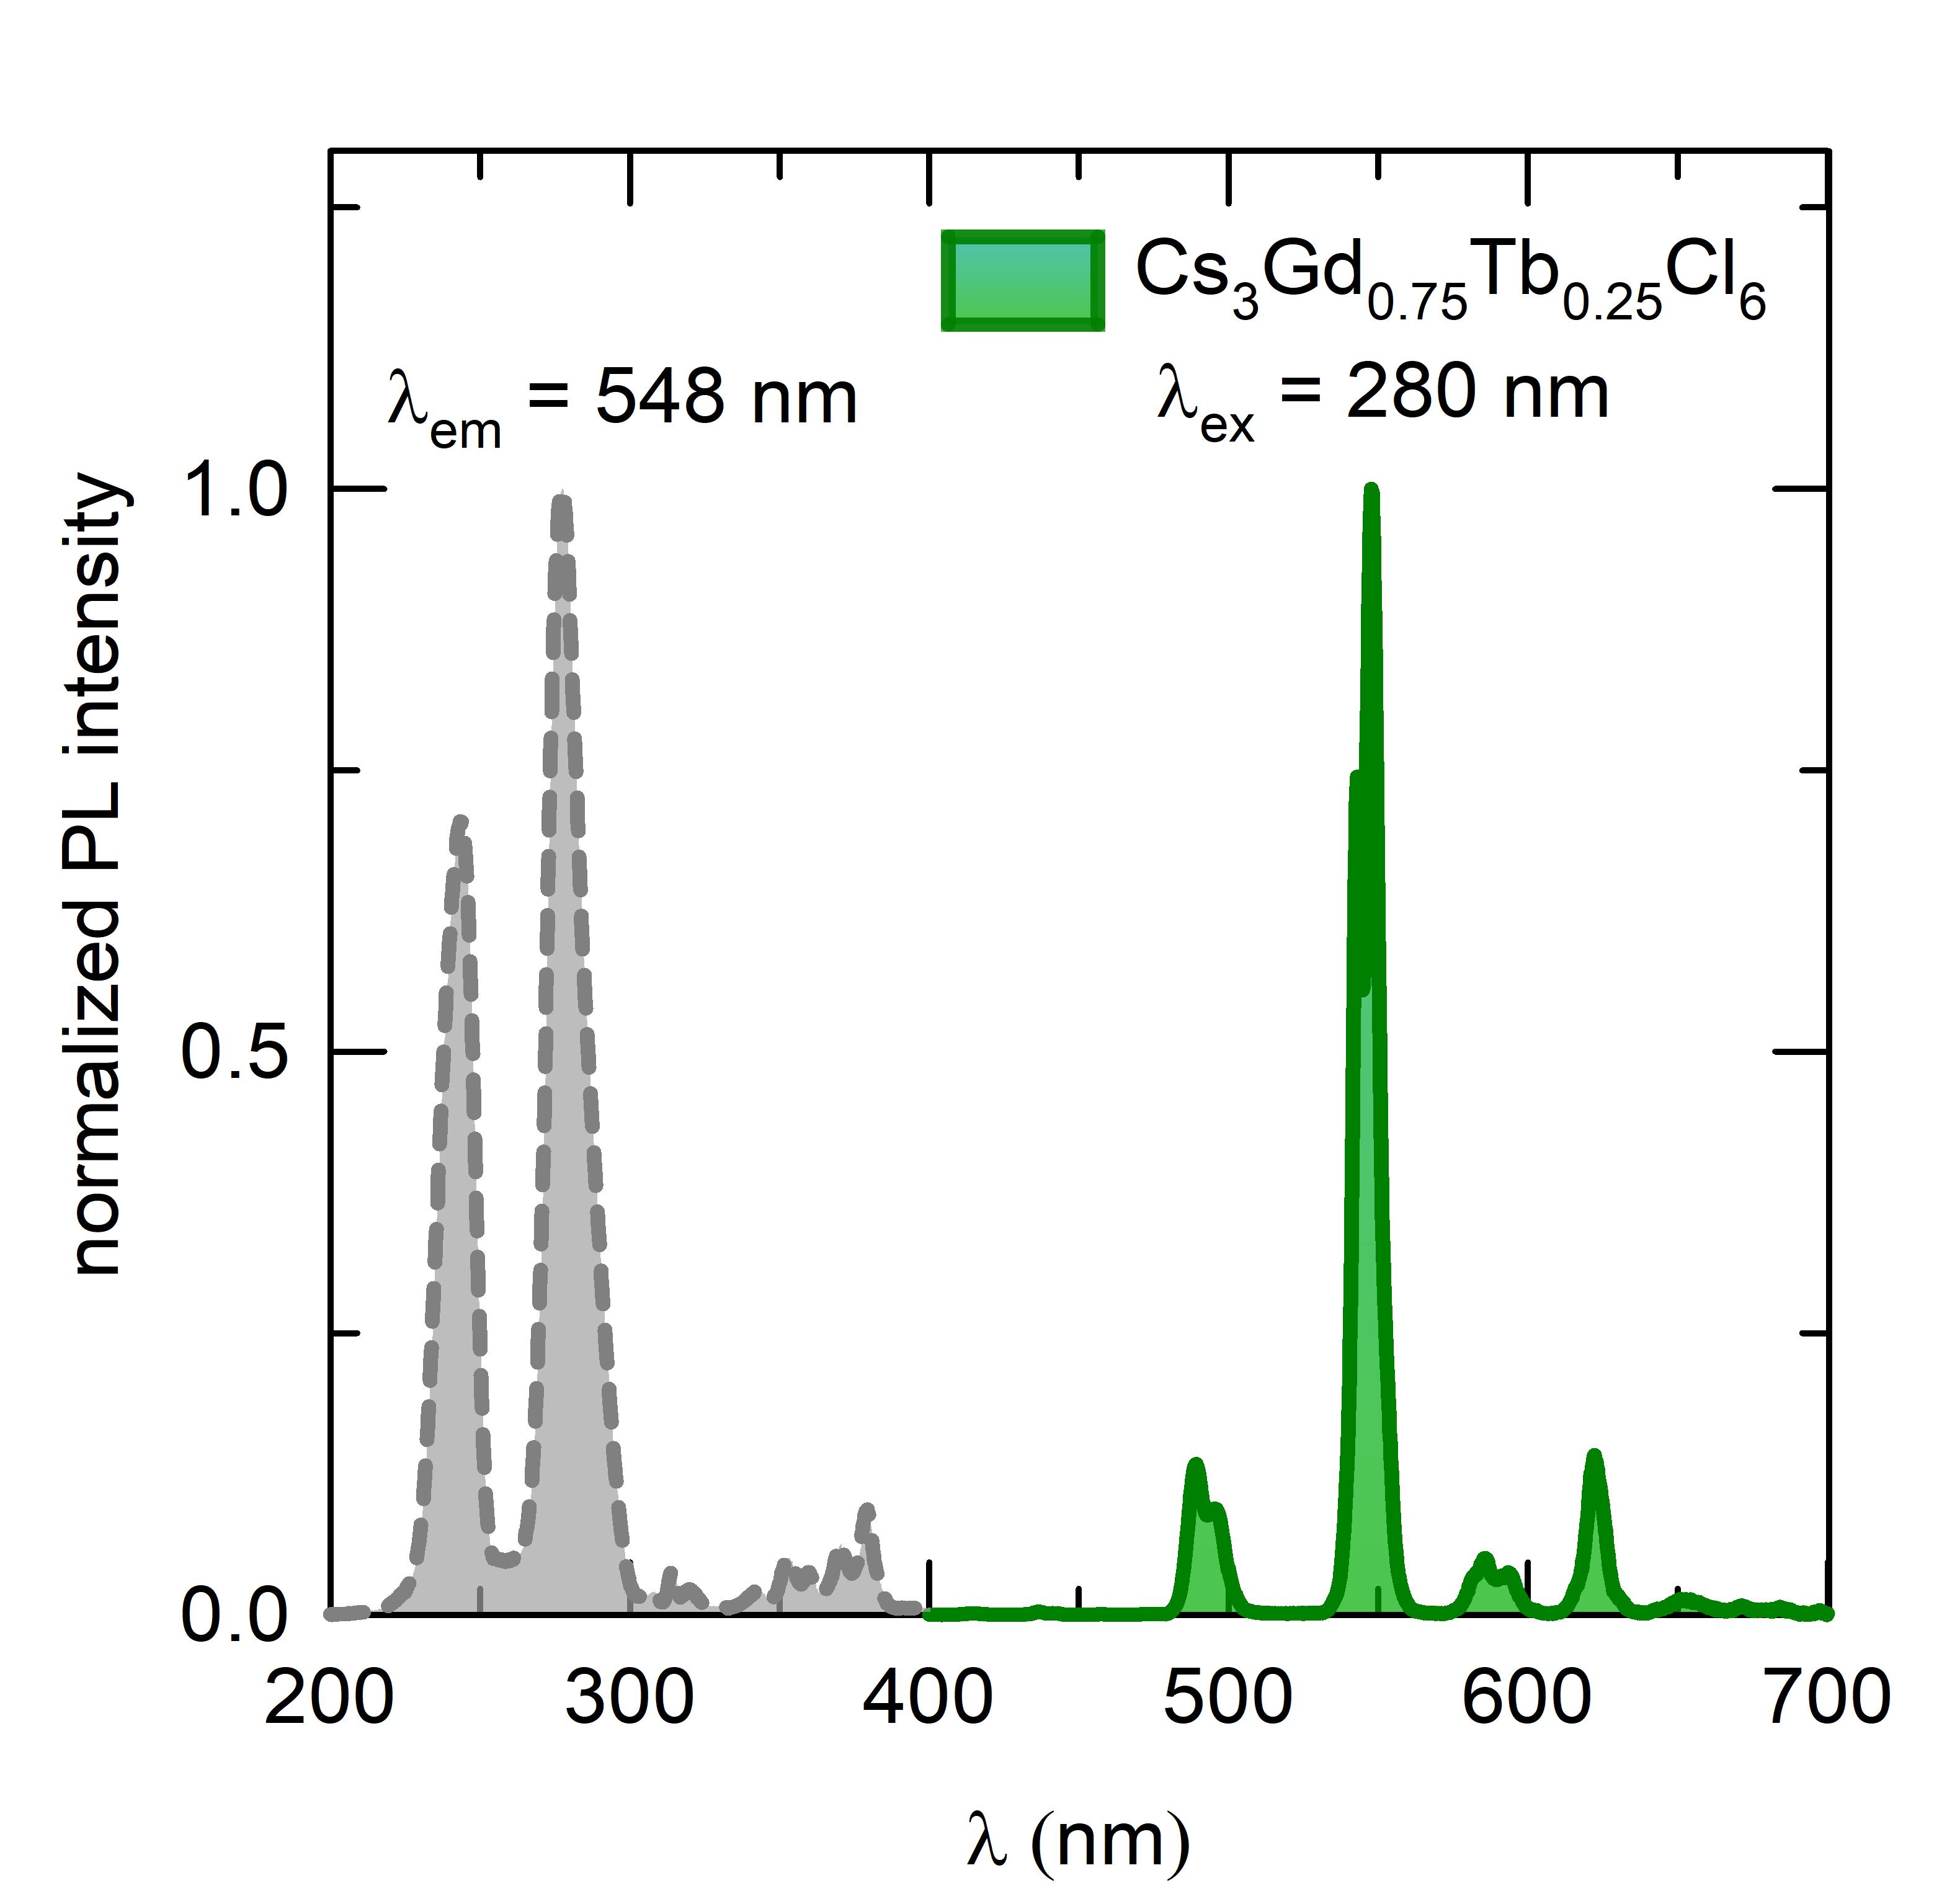
**

**Supplementary Fig. 3.** PL and PLE spectra of Cs3Gd0.75Tb0.25Cl6.


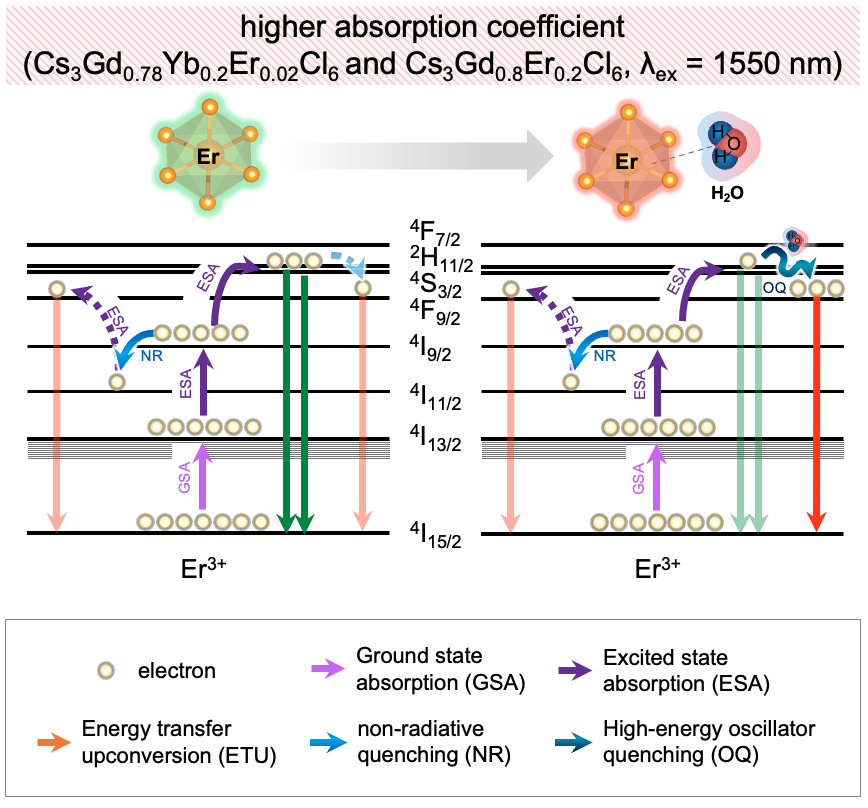


**Supplementary Fig. 4.** Schematic illustration of hydrochromic upconversion mechanism under 1550 nm excitation for Yb/Er co-doped and Er-doped systems.
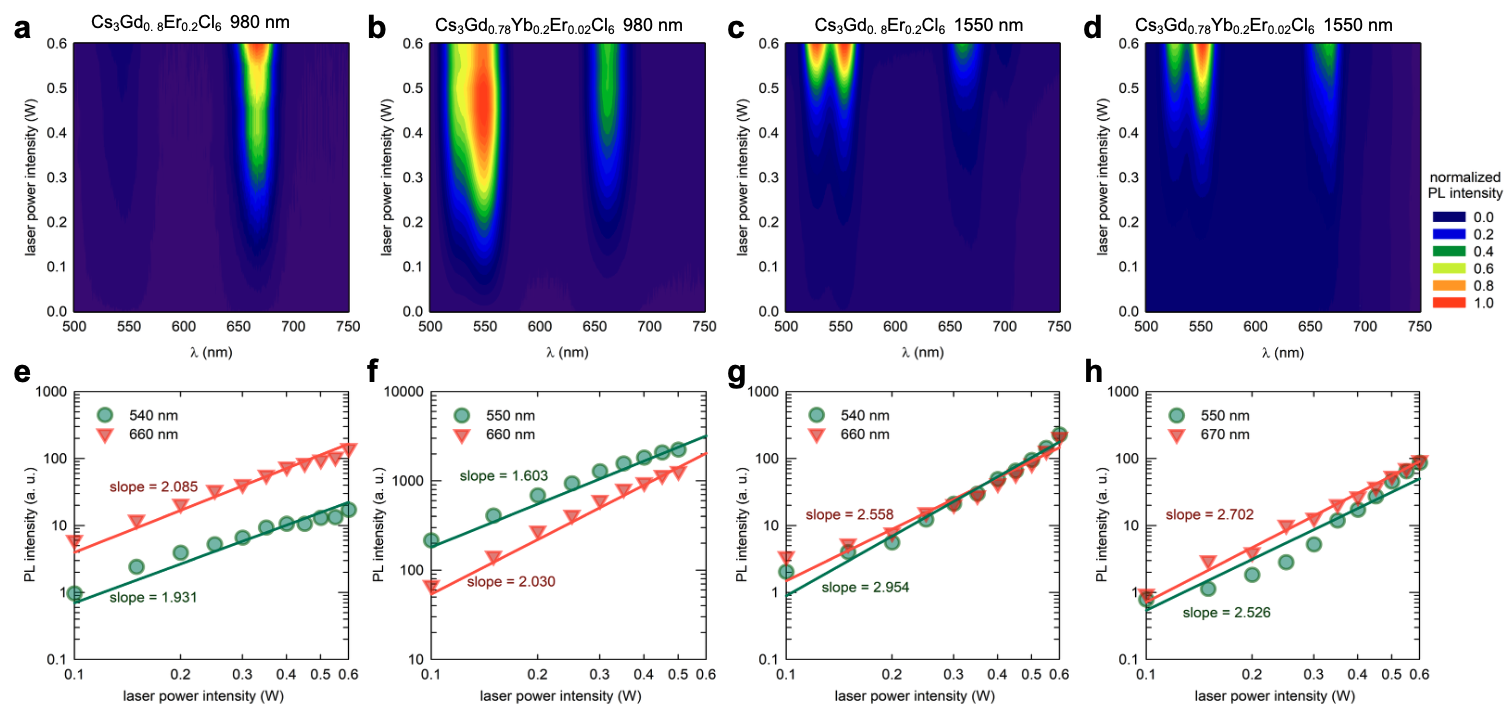


**Supplementary Fig. 5.** Laser power-dependent PL spectra under 980 nm and 1550 nm excitation of **a-d** Cs3Gd0.8Er0.2Cl6 and Cs3Gd0.78Yb0.2Er0.02Cl6. Pump power dependence of green and red upconversion intensity: **e-h** Cs3Gd0.8Er0.2Cl6 and Cs3Gd0.78Yb0.2Er0.02Cl6under 980 nm and 1550 nm excitation.


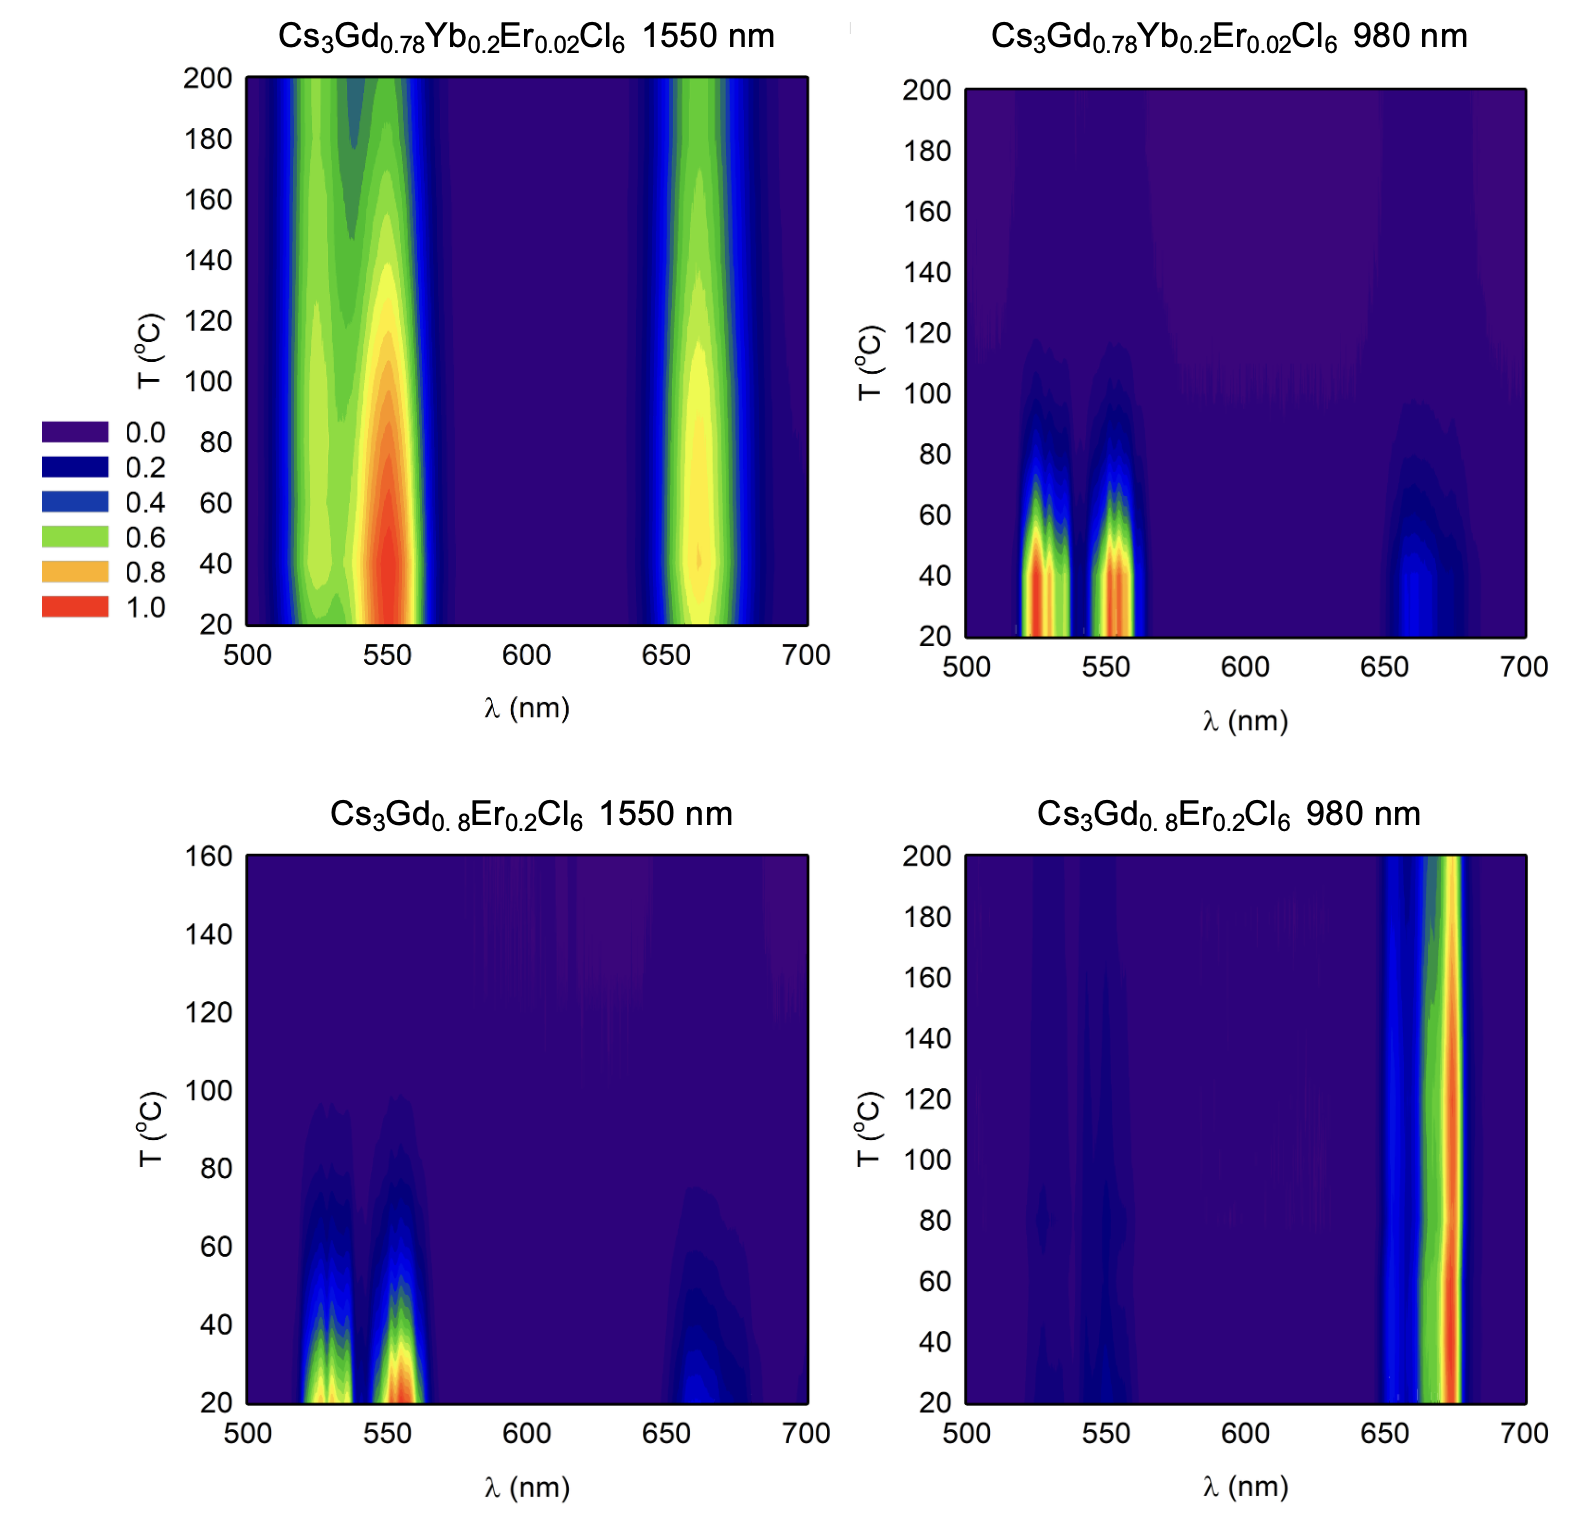


**Supplementary Fig. 6.** Temperature-dependent upconversion luminescence contour maps of Cs3Gd0.8Er0.2Cl6 and Cs3Gd0.78Yb0.2Er0.02Cl6 under 980 nm and 1550 nm excitations in the temperature range of 20–200℃.


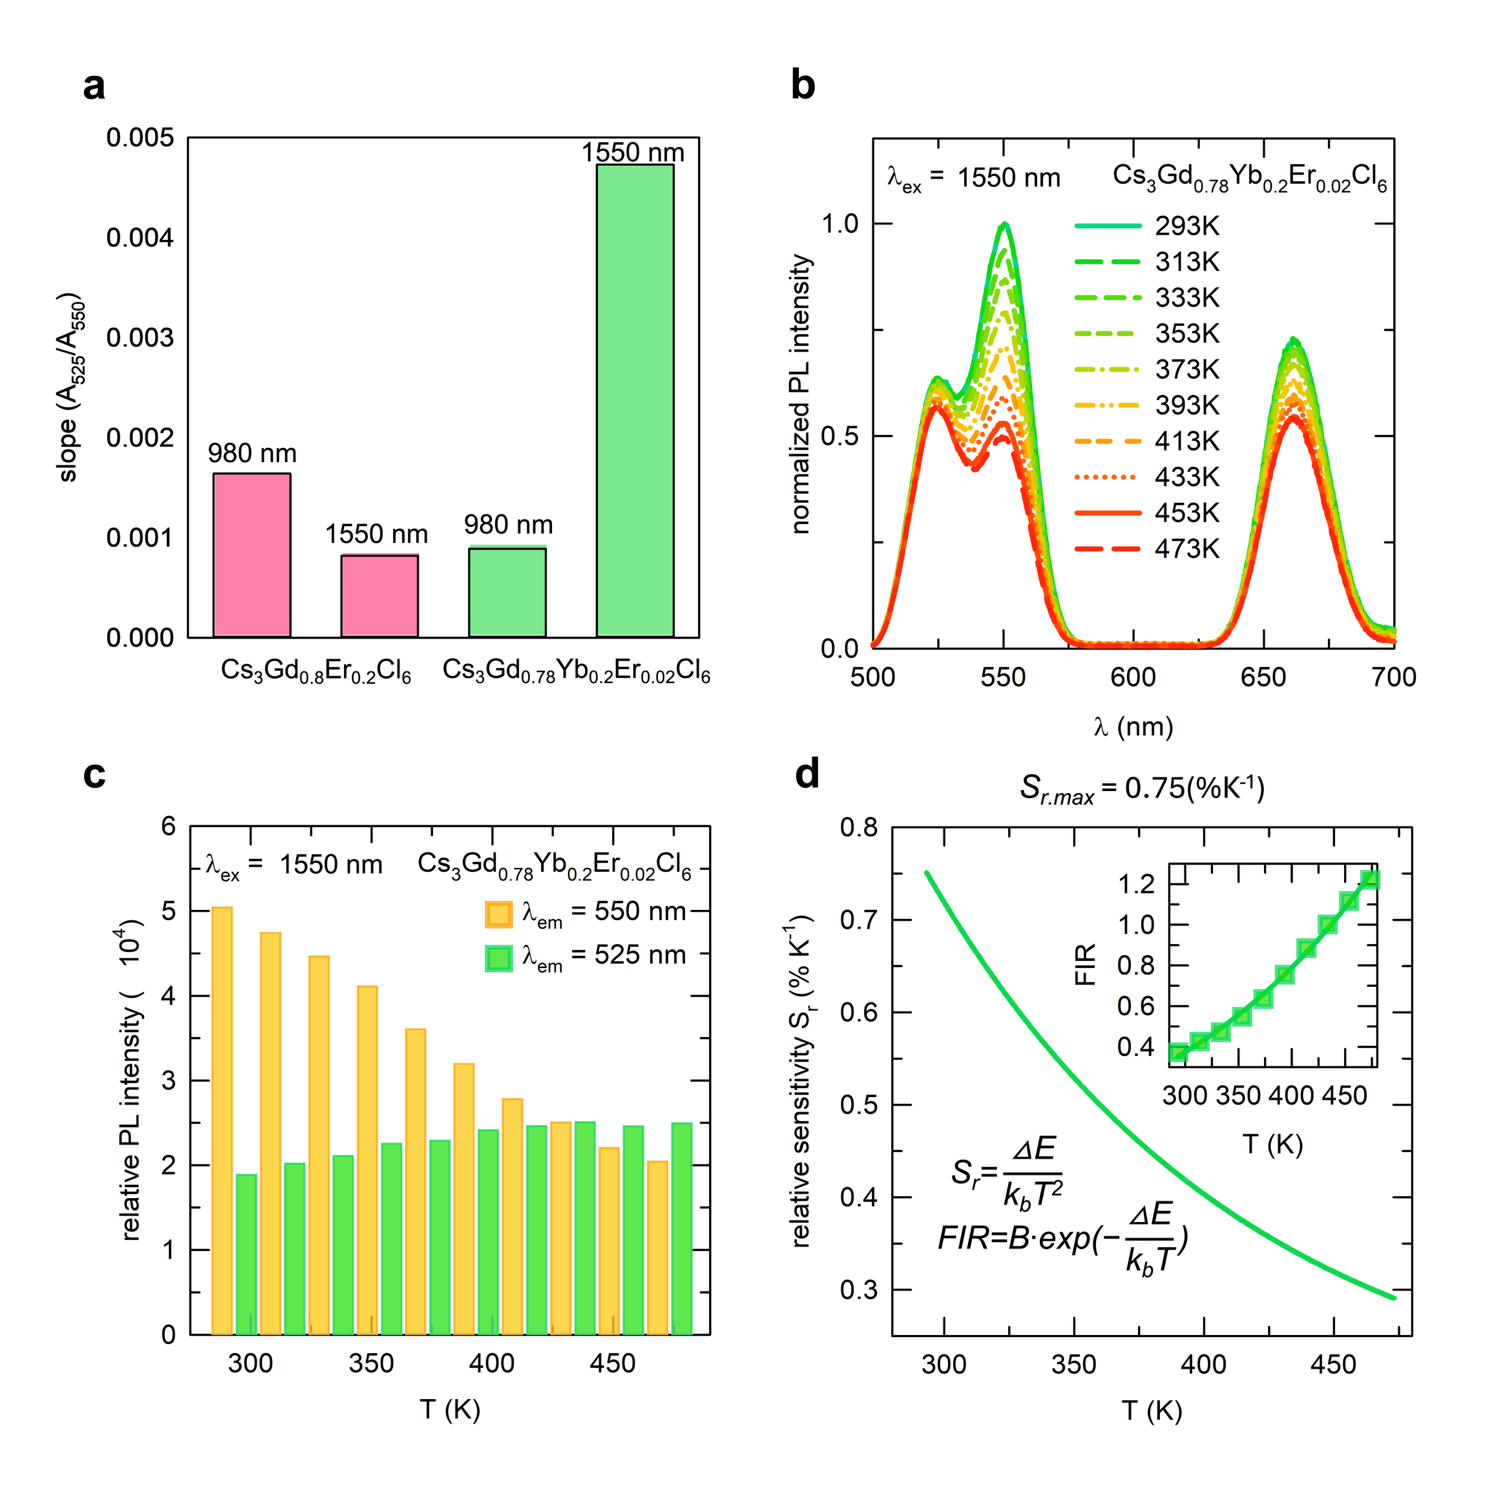


**Supplementary Fig. 7.** Optical thermometry performance of Cs3Gd0.78Yb0.2Er0.02Cl6 under 1550 nm excitation. **a** Comparison of absorbance slopes, **b** temperature-dependent PL spectra showing thermally coupled level behavior, **c** relative PL intensity variations of 525 nm and 550 nm emissions, and **d** fluorescence intensity ratio (FIR) fitting and relative sensitivity (Sr) curve.

**
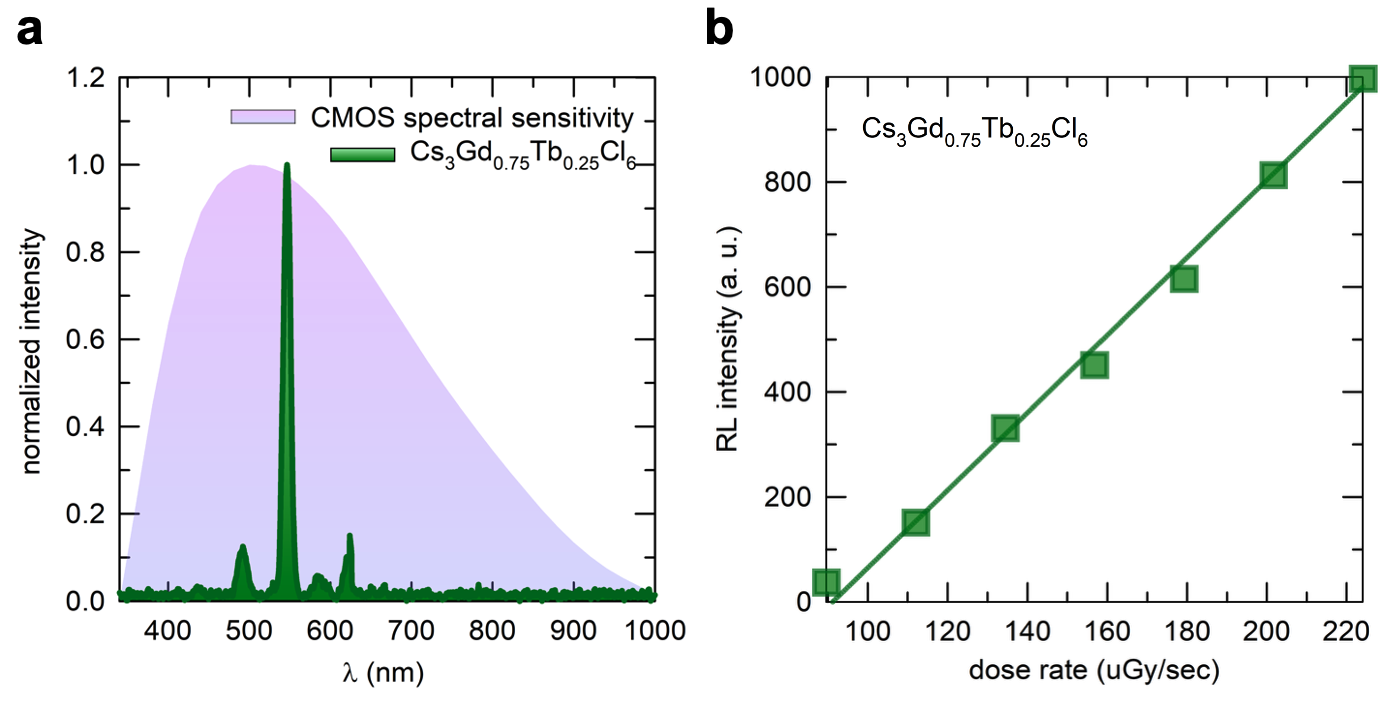
**

**Supplementary Fig. 8.** X-ray detection characteristics of Cs3Gd0.75Tb0.25Cl6. **a** Spectral matching between radioluminescence (RL) emission and the spectral sensitivity of a commercial CMOS sensor. **b** Linear relationship between RL intensity and X-ray dose rate.
